# Outdoor Transmission of SARS-CoV-2 and Other Respiratory Viruses: A Systematic Review

Tommaso Celeste Bulfone,<sup>1</sup> Mohsen Malekinejad,<sup>2</sup> George W. Rutherford,<sup>2,3</sup> and Nooshin Razani<sup>2,3</sup>

<sup>1</sup>Joint Medical Program, University of California Berkeley–University of California San Francisco, Berkeley, California, USA, <sup>2</sup>Department of Epidemiology and Biostatistics, University of California San Francisco, San Francisco, California, USA, and <sup>3</sup>Department of Pediatrics, University of California San Francisco, San Francisco, California, USA

**Background.** While risk of outdoor transmission of respiratory viral infections is hypothesized to be low, there are limited data on SARS-CoV-2 transmission in outdoor compared to indoor settings.

**Methods.** We conducted a systematic review of peer-reviewed papers indexed in PubMed, EMBASE, and Web of Science and preprints in Europe PMC through 12 August 2020 that described cases of human transmission of SARS-CoV-2. Reports of other respiratory virus transmission were included for reference.

**Results.** Five identified studies found a low proportion of reported global SARS-CoV-2 infections occurred outdoors (<10%) and the odds of indoor transmission was very high compared to outdoors (18.7 times; 95% confidence interval, 6.0–57.9). Five studies described influenza transmission outdoors and 2 adenovirus transmission outdoors. There was high heterogeneity in study quality and individual definitions of outdoor settings, which limited our ability to draw conclusions about outdoor transmission risks. In general, factors such as duration and frequency of personal contact, lack of personal protective equipment, and occasional indoor gathering during a largely outdoor experience were associated with outdoor reports of infection.

**Conclusions.** Existing evidence supports the wide-held belief that risk of SARS-CoV-2 transmission is lower outdoors but there are significant gaps in our understanding of specific pathways.

**Keywords.** coronaviruses; SARS-CoV-2; COVID-19; transmission; outdoor.

Recommendations about methods to curb transmission of severe acute respiratory syndrome coronavirus type 2 (SARS-CoV-2) beyond wearing masks and maintaining social distance have varied, especially regarding outdoor transmission [1]. This variability reflects a general lack of information on how SARS-CoV-2 is transmitted outdoors.

Outdoor spaces generally allow for more physical distancing, which mitigates the risk of virus transmission through larger respiratory droplets [2]. Outdoor spaces allow for airflow, ventilation, and lack of recycled air, which all minimize the theoretical risk of aerosol transmission through smaller respiratory droplets. While aerosol spread in community settings is controversial, emerging data suggest that indoor recycled air can spread SARS-CoV-2—with examples of spreading events in a restaurant in Guangzhou [3], at an indoor choir practice in Skagit, Washington, United States [4], at a South Korean call center [5], at meat-packing plants in the United States [6], and in a nursing home in the Netherlands [7]. In areas with low ventilation, aerosolized droplets have the capacity to linger

for longer before being inhaled or falling to a surface, which could result in fomite transmission [8]. In enclosed environments, low humidity, air conditioning, and low UV light may all contribute to longer survival of viral particles [9]. Outdoor environments also generally have fewer high-touch surfaces that may harbor the virus. UV light, present outdoors from sunlight, results in a 10-fold decrease in virus survival on surfaces [10]. Finally, indoor environments may increase host susceptibility; the low indoor humidity has been associated with slower host ciliary clearance and complications such as pneumonia, and lack of sunlight has been associated with lower vitamin D levels [11]. For these reasons, the risk of virus transmission in outdoor locations has been hypothesized to be lower than in indoor spaces.

We sought to quantify the risk of SARS-CoV-2 transmission in outdoor settings. We conducted a systematic review of the literature on transmission of SARS-CoV-2 to better understand the risks of outdoor transmission. Where data were available, we estimated the risk of outdoor compared to indoor transmission. Anticipating a paucity of data on SARS-CoV-2, we chose a broad search strategy that included other human betacoronaviruses and respiratory viruses.

## METHODS

### Search Strategy and Selection Criteria

Data for this review were identified by searches of PubMed, EMBASE, Web of Science, as well as preprints available in

Received 1 October 2020; editorial decision 23 November 2020; accepted 27 November 2020; published online November 29, 2020.

Correspondence: N. Razani, MD, 550 16th Street, 2nd Floor, University of California, San Francisco, CA 94158 (nooshin.razani@ucsf.edu).

The Journal of Infectious Diseases® 2021;223:550–61

© The Author(s) 2020. Published by Oxford University Press for the Infectious Diseases Society of America. All rights reserved. For permissions, e-mail: journals.permissions@oup.com. DOI: 10.1093/infdis/jjaa742

Europe PMC [12]. Details of our search strategies and eligibility criteria can be found in our protocol published on 3 August 2020 on PROSPERO (ID, 183826: [www.crd.york.ac.uk/prospero/](http://www.crd.york.ac.uk/prospero/)). The search was conducted on 17 June 2020, and because of the rapidly expanding data on SARS-CoV-2, the search was repeated to include most-recent literature on 12 August 2020.

### Exposures and Outcomes

The exposure of interest—outdoor gatherings—was defined as persons congregating outdoors for work, social, or recreational activities (see [Supplementary Material 1](#) for our full search strategy). The outcome of interest included cases of transmission of SARS-CoV-2 or other respiratory viruses identified by a case report, illness, or mortality. We also included secondary outcomes of clusters or outbreaks of cases. Our search included any viral infection that can be spread by respiratory droplets and, in addition to SARS-CoV-2, included the other 2 recognized human betacoronaviruses (SARS-CoV-1 and Middle east respiratory syndrome-CoV), human influenza viruses, adenoviruses, rhinoviruses, human metapneumoviruses, and respiratory syncytial virus.

We included studies (experimental or observational with empirical data collection) that described human-to-human transmission of respiratory viruses between humans in an outdoor setting, any review of these studies, and any study (experimental or observational) that compared respiratory viral transmission among humans in an outdoor versus indoor settings.

We excluded reviews of previously published data, studies of exclusively indoor outbreaks, outdoor outbreaks within animal populations or between animals and humans, and outbreaks where the site of transmission was not listed or was unclear. We also excluded studies limited to built environments (homes, apartment buildings, military barracks), hospitals, or forms of transportation (airplanes, trains, buses, cars, ships).

### Data Selection and Extraction

After removing duplicate records, 1 author (T. C. B.) reviewed all downloaded citations based on their titles and prespecified inclusion criteria. A second author (M. M.) reviewed a 5% random sample of the excluded titles (rejected from initial search results) for quality control. Two authors (T. C. B. and N. R.) then independently screened the titles, abstracts, and descriptor terms and compared and discussed discrepancies until consensus was reached; a third author (M. M.) served as an arbiter when needed. Two authors (T. C. B. and N. R.) then independently inspected the full texts of the remaining studies for relevance based on exposure, design, and outcome measures to select the included papers, and discussed discrepancies until consensus was reached with a third author (M. M.) serving as arbiter. We used Endnote X9.3.2 (Clarivate Analytics) and Rayyan (Qatar Computing Research Institute, Doha, Qatar) web-based software to manage search results [13].

Two authors (T. C. B. and N. R.) extracted the following data from each paper into a prepiloted data extraction form in Excel spread sheets: complete citation, study location, study design, details of participants (risk group or groups, sample size), exposure details (type of gathering, characteristics of gathering place, number of people, duration, proportion of time spent outdoors, amount if any of indoor transmission, how the nonexposure state (indoors) was defined, outcomes (numerators and denominators associated with each outcome, definitions and descriptions of outcomes provided in papers, details of how outcomes were assessed, individual cases of infection and/or large spreading events, mortality), methodological details (sample characteristics, how the information was gathered, how the outbreak was investigated), and details related to bias assessment.

### RESULTS

The combined searches yielded 10 912 unique citations, of which 12 studies met our inclusion criteria. Nine studies were identified from the 17 June 2020 search, 2 from the 12 August 2020, and 1 from a targeted search. Out of the 12 that met our inclusion criteria, 5 were pertaining to SARS-CoV-2 ([Table 1](#) and [Table 2](#)), 5 reported on influenza or influenza-like viruses ([Table 3](#)), and 2 reported on adenovirus transmission. Of note, 33 studies were excluded because they did not specify the location of transmission ([Supplementary Material 2](#)). The Preferred Reporting Items for Systematic Reviews and Meta-Analyses (PRISMA) diagram is shown in [Figure 1](#).

Five studies related to SARS-CoV-2 transmission found that less than 10% of reported transmission occurred in outdoor settings, less than 5% of cases were related to outdoor occupations, and the odds of transmission or super-spreading are much lower outdoors ([Table 1](#)) [14–17].

Of 318 identified outbreaks involving 3 or more cases in China reported to local Municipal Health Commissions from 4 January to 11 February 2020, Qian et al found that all occurred in indoor environments [14]. They reported a single transmission that occurred outdoors (1 case of outdoor transmission out of 7324 total reported cases). This report, however, might be affected by strict interventions prohibiting mass gatherings outdoors, which likely contributed to the low number of cases contracted outdoors. Additionally, relying on local health department reports may have led to underestimates of the total number of transmissions, especially those that were asymptomatic [14].

Nishiura et al [16] analyzed the transmission pattern of coronavirus disease 2019 (COVID-19) reported through 28 February 2020 (11 clusters and sporadic cases) in Japan. They concluded that the odds of a primary case transmitting COVID-19 in a closed environment were 18.7 times greater (95% confidence interval [CI], 6.0–57.9) compared to outdoor setting (defined as an open-air environment). The odds of a single case spreading

**Table 1. Comparison of Respiratory Virus Transmission Outdoors Compared to Indoors Ordered by Virus Studied**

| Outcome                                                                     | Virus Studied       | Estimate of Effect                                            |                                                             |                                                                                                    | Number of Participants in the Study                                      |
|-----------------------------------------------------------------------------|---------------------|---------------------------------------------------------------|-------------------------------------------------------------|----------------------------------------------------------------------------------------------------|--------------------------------------------------------------------------|
|                                                                             |                     | Outdoor                                                       | Indoor                                                      | Relative Estimate of Effect                                                                        |                                                                          |
| Number of cases [14]                                                        | SARS-CoV-2          | 2/7324 cases                                                  | 7322/7324 cases                                             | <1% of transmissions happened outdoors                                                             | 7324 cases, totaling 318 outbreaks                                       |
| Number of cases [15]                                                        | SARS-CoV-2          | 4/103 cases                                                   | 99/103 cases                                                | 5% of work-related cases occurred outdoors                                                         | 103 possible work-related cases among a total of 690 local transmissions |
| Odds of transmission [16]                                                   | SARS-CoV-2          | Raw data not available                                        | Raw data not available                                      | Odds of transmission in closed environments 18.7 (95% CI, 6.0–57.9) times greater than in open air | 110 cases: 27 primary cases and 83 secondary cases                       |
| Number of super-spreading events and odds of transmission <sup>a</sup> [16] | SARS-CoV-2          | 1/7 super-spreading events                                    | 6/7 super-spreading events                                  | Odds ratio of super-spreading in closed environments: 32.6 (95% CI, 3.7–289.5)                     | 110 cases: 27 primary cases and 83 secondary cases                       |
| Number of cases [17]                                                        | SARS-CoV-2          | 95/10 926 cases                                               | 10 831/10 926 cases                                         | <1% of transmissions happened outdoors                                                             | 10 926 cases, totaling 201 events of transmission                        |
| Number of cases [18]                                                        | H1N1 2009 influenza | 0/3 cases                                                     | 24/29 cases                                                 | Of 32 total people in a holiday camp, 29 traveled together in a train wagon                        | 32 people at a holiday camp                                              |
| Mortality [19]                                                              | H1N1 1918 influenza | 28/820 deaths sleeping in hammocks outside, 34.1 persons/1000 | 39/267 deaths sleeping in cabins inside, 146.1 persons/1000 | Risk ratio 4.28 (95% CI, 2.69–6.81)                                                                | Total 1217 people on the ship                                            |

Abbreviations: CI, confidence interval; SARS-CoV-2, severe acute respiratory syndrome coronavirus 2.

<sup>a</sup>Super-spreading defined as events where the number of secondary cases generated by a single primary case is greater than the 95th percentile of the distribution (ie, transmission to 3 or more persons).

to 3 or more individuals, which they defined as a super-spreader event, in closed environments compared to open air was 32.6 (95% CI, 3.7–289.5). This report, however, included no description of the context or location of the outdoor transmission nor were any raw data provided. It is unclear whether this report is relying on proportions, which again may be subject to the fact that fewer people would have been outdoors during winter months in Japan.

Leclerc et al [17] reviewed 201 transmission clusters of COVID-19 worldwide that had been reported up to 30 March 2020. The vast majority of these transmissions were associated with indoor or indoor/outdoor settings (197/201 clusters or 21/22 locations). The 1 outdoor setting was at multiple construction sites in Singapore, where 4 outbreaks occurred. Leclerc's updated results by August 12, from non-peer reviewed sources, additionally revealed one transmission occurred while jogging in Codogno, Italy, and twenty cases in an outdoor park in Münster, Germany (Table 4).

Lan et al [15] investigated 103 possible work-related cases of COVID-19 among a total of 690 local cases in 6 Asian countries or regions, including Hong Kong, Japan, Singapore, Taiwan, Thailand, and Vietnam. In this paper, construction workers in Singapore constituted only 5% of the total work-related transmissions. While this paper did not explicitly state whether the location of work-related transmission was outdoor or indoors, it was included based on Leclerc's classification of the same construction workers as an outdoor setting. This does not rule out

that that transmission may have occurred in indoor locations at construction sites.

Szablewski et al [20] report SARS-CoV-2 transmission at an overnight camp in Georgia, United States, where attack rates increased with increasing length of time at the camp, and with cohousing. Staff members, who stayed the longest at the camp, had the highest attack rate (56%). The outbreak was clustered by cabin assignments, which suggests a high likelihood of transmission in indoor spaces during overnight cabin stays rather than during outdoor activities during the day. The authors state that nonpharmaceutical interventions such as cohorting and adults wearing masks during the day, were not protective, although no further information is given about this claim.

While there is high heterogeneity in the studies describing outdoor transmission of SARS-CoV-2, the studies we found highlight the conditions of outdoor exposure and transmission. The location and context of SARS-CoV-2 transmissions reported in this review are summarized in Table 4. Among these are examples of transmissions at a gathering in a park, but over multiple days with the same people, and at a camp, which lasted for several days and had indoor housing components.

Five other studies included in Table 3 describe outdoor transmission of influenza or influenza-like viruses. Summers et al [19] conducted a historical analysis of a large outbreak of the 1918 influenza virus on a military troop ship in July 1918. The outbreak involved over 1000 of the 1217 crew members and caused 68 deaths. Analysis of factors that might have contributed to

**Table 2. Studies Reporting Outdoor SARS-CoV-2 Transmission**

| Reference                | Location and Date                                            | Sample Description                                                                    | Design                                                                                                                                   | Outcomes Measured                                                                                                                                                                                                                                                                      | Outdoor: Exposure                                                                                                                                                                             | Outdoor: Findings                                                                                                                                                                                                                                                                                                                          | Indoor Findings                                                                                                                        | Bias                                                                                                                                                                                                                                                                                                                                                                                                     |
|--------------------------|--------------------------------------------------------------|---------------------------------------------------------------------------------------|------------------------------------------------------------------------------------------------------------------------------------------|----------------------------------------------------------------------------------------------------------------------------------------------------------------------------------------------------------------------------------------------------------------------------------------|-----------------------------------------------------------------------------------------------------------------------------------------------------------------------------------------------|--------------------------------------------------------------------------------------------------------------------------------------------------------------------------------------------------------------------------------------------------------------------------------------------------------------------------------------------|----------------------------------------------------------------------------------------------------------------------------------------|----------------------------------------------------------------------------------------------------------------------------------------------------------------------------------------------------------------------------------------------------------------------------------------------------------------------------------------------------------------------------------------------------------|
| Qian et al 2020 [14]     | 320 prefectural cities, China, 4 January to 11 February 2020 | 7324 cases, 318 outbreaks                                                             | Retrospective analysis of all public health reports from local Municipal Health Commission website to determine location of transmission | Location of transmissions, clusters, and outbreaks. Cluster defined as 3 or more infections that appear linked to the same infection venue. Outbreak defined as a cluster in which a common index patient is suspected. Outbreaks were organized by relationship and also by location. | Open air                                                                                                                                                                                      | One outdoor transmission involving 2 cases in Shangqiu, Henan: a 27-year-old man had a conversation outdoors with an individual who had returned from Wuhan                                                                                                                                                                                | Of 318 identified outbreaks that involved 3 or more cases, they all occurred indoors                                                   | Relied on heterogeneous case reports of the local health department, which might have missed cases because of differential allocation of resources or internal biases. Additionally, the data were collected partly after lockdown (started 23 January 2020 in Wuhan), after which most people were indoors.                                                                                             |
| Nishiura et al 2020 [16] | 7 prefectures in Japan, start date 28 February 2020          | 110 cases (27 primary cases, 83 secondary cases); 7 super-spreading events identified | Retrospective case investigation using contact tracing data                                                                              | Location and number of transmissions from primary to secondary cases. Super-spreading events defined as number of secondary cases generated by a single primary case is greater than the 95th percentile of the distribution (ie, transmission to 3 or more persons)                   | Open air                                                                                                                                                                                      | Odds of transmission in a closed environment was 18.7 times greater compared to an open-air environment (95% CI, 6.0–57.9). Odds ratio of super-spreading events in closed environments was as high as 32.6 (95% CI, 3.7–289.5). One super-spreading event occurred outdoors (not described).                                              | Of 7 super-spreading events, 6 (85.7%) took place in closed environments                                                               | Small sample size and no raw data provided to support calculations of odds. Limitations were not discussed in the manuscript. Not peer-reviewed at the time of review.                                                                                                                                                                                                                                   |
| Leclerc et al 2020 [17]  | Multiple world-wide locations, as of 30 March 2020           | 201 events of transmission (clusters)                                                 | Review of all documented transmission clusters (world-wide) using literature review and open-source strategies                           | Settings of transmission clusters for 201 events                                                                                                                                                                                                                                       | 22 types of settings were determined. Outdoor locations were defined as outdoor, while locations that were a mixture were defined as indoor/outdoor. Indoor locations were defined as indoor. | The transmissions in the only outdoor setting occurred in 4 outbreaks at outdoor construction sites in Singapore, totaling 95 cases. Updated results additionally revealed 1 transmission occurred while jogging in Codogno, Italy (nonpeer reviewed source) and 20 cases in an outdoor park in Münster, Germany (nonpeer reviewed source) | 10/22 locations defined as indoor/outdoor, 11/22 defined as indoor. Total 197 events occurred in these settings, totaling 10 831 cases | Included reports from some nonpeer reviewed sources (eg, local media outlets for the jogging and outdoor park transmission reports), which might have been individually influenced by recall bias and poor methodology. While the study conducted a systematic review, additional sources were collected using an open-source strategy, which might have been affected by selection bias of respondents. |

**Table 2. Continued**

| Reference                  | Location and Date                                                                                                                      | Sample Description                                                                                                                                                                                                                                           | Design                                                                                                                                                                                                                   | Outcomes Measured                                                                                                                 | Outdoor Exposure                                                                                                                               | Outdoor Findings                                                                                                                                                                                                                                                                               | Indoor Findings                                                                                                                                                                                                                   | Bias                                                                                                                                                                                                                                                                                                                                                                                                                                                                 |
|----------------------------|----------------------------------------------------------------------------------------------------------------------------------------|--------------------------------------------------------------------------------------------------------------------------------------------------------------------------------------------------------------------------------------------------------------|--------------------------------------------------------------------------------------------------------------------------------------------------------------------------------------------------------------------------|-----------------------------------------------------------------------------------------------------------------------------------|------------------------------------------------------------------------------------------------------------------------------------------------|------------------------------------------------------------------------------------------------------------------------------------------------------------------------------------------------------------------------------------------------------------------------------------------------|-----------------------------------------------------------------------------------------------------------------------------------------------------------------------------------------------------------------------------------|----------------------------------------------------------------------------------------------------------------------------------------------------------------------------------------------------------------------------------------------------------------------------------------------------------------------------------------------------------------------------------------------------------------------------------------------------------------------|
| Lan et al 2020 [15]        | 6 Asian regions: 690 locally transmitted cases<br>Hong Kong, Japan, Singapore, Taiwan, Thailand, and Vietnam; 23 January–14 March 2020 | 690 locally transmitted cases                                                                                                                                                                                                                                | Observational study, extracted confirmed COVID-19 cases from governmental investigation reports. Only locally transmitted (nonimported) cases were included. Transmission period was extended to 40 d from primary case. | Number of cases per occupation across country/area and stratified into early (first 10 d) and late (11–40 d) transmission periods | Workplace largely outdoors                                                                                                                     | A total of 103 possible work-related cases were determined to be outdoors among a total of 690 local transmissions. Of workers that might be prevalently outdoors, 5% of cases were construction workers. Tour guides (5% of cases) might also be considered to have occurred partly outdoors. | The 5 occupation groups with the most cases were health care workers (22%), drivers (22%), and transport workers (18%). Services and sales workers (18%), cleaning and domestic workers (9%), and public safety workers (7%).     | The exact outdoor/indoor makeup of the location of transmission was not described. This is in part due to the fact that the transmission source was not always known, and detailed occupational histories were also not always known. Also, none of the reports arose from systematic testing of high-risk occupations, rather from individual case reports, which might have been affected by biased and heterogeneous reporting mechanisms from different regions. |
| Szablewski et al 2020 [20] | Overnight camp in Georgia, United States, 17–27 June 2020                                                                              | During 17–20 June the overnight camp held orientation for 138 trainees and 120 staff members; remained for the first camp session, scheduled 21–27 June, and were joined by 363 campers and 3 senior staff members on 21 June. Children and adults attended. | Retrospective case investigation (MMWR)                                                                                                                                                                                  | Positive test result for SARS-CoV-2 (symptomatic and asymptomatic)                                                                | Camp attendees were cohorted by cabin and engaged in a variety of indoor and outdoor activities, including daily vigorous singing and cheering | On 24 June a staff member tested positive to SARS-CoV-2. Test results were later available for 344 attendees; among these, 260 (76%) were positive. The percentage of transmission that developed solely outdoors was not investigated.                                                        | Median cabin attack rate was 50% among 28 cabins that had 1 or more cases (on average, each cabin housed 15 people). Attack rate was highest in the larger cabin, suggesting the main location of transmission was in the cabins. | Attack rates are likely an underestimate because cases among persons not tested or whose test results were not reported. Some cases may have resulted from transmission occurring before or after camp attendance. Exact details of outdoor activities versus indoor were not described.                                                                                                                                                                             |

Abbreviations: CI, confidence interval; COVID-19, coronavirus disease 2019; MMWR, Morbidity and Mortality Weekly Report; SARS-CoV-2, severe acute respiratory syndrome coronavirus 2.

**Table 3. Studies Reporting Other Outdoor Respiratory Virus Transmission Ordered by Infection Identified**

| Reference                      | Disease                                           | Location and Date                             | Sample Description                                                                                                        | Design                                                                                                                                                                                                               | Outcomes Measured                                                                                                                                                                                                                                                                                                                   | Exposure                                                                                                                                                                                                                                                                                                                                              | Outdoor Findings                                                                                                                                                                                                                                                                                                                                                                                                                                                            | Indoor Findings                                                                                                                                                                                                                                                                                                                                                                      | Bias                                                                                                                                                                                                                                                                                                                                                                                 |
|--------------------------------|---------------------------------------------------|-----------------------------------------------|---------------------------------------------------------------------------------------------------------------------------|----------------------------------------------------------------------------------------------------------------------------------------------------------------------------------------------------------------------|-------------------------------------------------------------------------------------------------------------------------------------------------------------------------------------------------------------------------------------------------------------------------------------------------------------------------------------|-------------------------------------------------------------------------------------------------------------------------------------------------------------------------------------------------------------------------------------------------------------------------------------------------------------------------------------------------------|-----------------------------------------------------------------------------------------------------------------------------------------------------------------------------------------------------------------------------------------------------------------------------------------------------------------------------------------------------------------------------------------------------------------------------------------------------------------------------|--------------------------------------------------------------------------------------------------------------------------------------------------------------------------------------------------------------------------------------------------------------------------------------------------------------------------------------------------------------------------------------|--------------------------------------------------------------------------------------------------------------------------------------------------------------------------------------------------------------------------------------------------------------------------------------------------------------------------------------------------------------------------------------|
| Figueroa et al 2017 [22]       | Respiratory disease outbreaks                     | United States, 2009–2014                      | 18 mass gatherings in 8 states                                                                                            | Data on mass-gathering-related respiratory disease outcomes; 50 state health departments and 31 large local health departments were contacted via online assessment; 43 (53%) of 81 health jurisdictions re-sponded  | Outbreak was defined as 1 or more cases of an infectious respiratory disease. Mass gathering (exposure) was defined as a planned or unplanned congregation of 1000 or more persons in either an indoor or outdoor venue for a common purpose.                                                                                       | Mass gathering-All reported outbreaks occurred at multiday mass gathering events. For influenza A (H1N1) attack rates at 2 summer camps were 1.4% and 4.8%. Attack rate for a religious event was 19.5%. At a sporting event in the spring, it was 3.3% but only included athletes. Attack rate of influenza A (H3) at another summer camp was 0.02%. | At a professional conference in the winter, which was likely to be mostly indoors, attack rate was of 21.0%. Probable factors that affected attack rates were participant density and susceptibility, rather than gathering size alone. Use of nonpharmaceutical interventions might have and their indoor/outdoor locations are not described.                                                                                                                             | Search strategy might have not captured studies that did not use the word outbreak, and might have missed any outbreak not captured by surveillance systems (eg, smaller outbreaks, of diseases with longer incubation periods). While indoor and outdoor characteristics of mass gatherings were discussed, exact amount of time spent outdoors compared to indoors not delineated. | Low response rate (around 50%) by state health departments, while there was no response from local health departments. There might be responder bias, given that departments that experienced mass gathering outbreaks might have been more willing to respond. Details of each mass gathering and their indoor/outdoor locations are not described.                                 |
| Rainey et al 2016 [21]         | Respiratory disease outbreaks                     | United States, 2005–2014                      | 21 published articles describing 72 mass-gathering-related respiratory disease outbreaks. 1114 outbreaks reported to NORS | 6 medical, behavioral, and social science literature databases were analyzed to extract relevant articles. NORS was also analyzed to estimate the frequency of mass-gathering-related respiratory disease outbreaks. | Mass gatherings were defined as large events involving more than 1000 persons in a specific location for a shared purpose. Definition of outbreak was deferred to the author's definition. Half of the reported outbreaks were related to a zoonotic source and were excluded. 38% of the outbreaks occurred at a variety of camps. | The authors did not specify outdoor vs indoor location of mass gathering                                                                                                                                                                                                                                                                              | Close social mixing and contact in communal housing/activities were associated with all other outbreaks identified. They concluded that multiday mass gatherings with indoor residential overnight components can facilitate transmission.                                                                                                                                                                                                                                  | All reported outbreaks in summer camps had social contact and communal housing, none reported without a housing component                                                                                                                                                                                                                                                            | Search strategy might have not captured studies that did not use the word outbreak, and might have missed any outbreak not captured by surveillance systems (eg, smaller outbreaks, of diseases with longer incubation periods). While indoor and outdoor characteristics of mass gatherings were discussed, exact amount of time spent outdoors compared to indoors not delineated. |
| Botelho-Nevers et al 2013 [23] | Disease outbreaks (including respiratory disease) | Open-air mass gatherings worldwide, 1980–2012 | 9 published articles about respiratory infections at large, outdoor mass gatherings, festivals, or music festivals        | Literature search using PubMed and MEDLINE database, with cross-referencing using search engines such as Google and Yahoo                                                                                            | Outbreaks in the setting of open-air gatherings generally outdoors, but which may have onsite indoor housing and food supply                                                                                                                                                                                                        | Mass gatherings defined as generally outdoors, but which may have onsite indoor housing and food supply                                                                                                                                                                                                                                               | 4 outbreaks of influenza A (H1N1) and 1 of influenza A and B were found. Overall, the estimated incidence of confirmed respiratory infections of influenza per 100 000 attendees ranged from 2 to 30. The discrepancy between sport events, which seem to have lower incidence, and large-scale open-air festivals in terms of infectious diseases may also be the consequence of the relatively short duration of sports events, which frequently last shorter than 1 day. | No exclusively indoor events were included                                                                                                                                                                                                                                                                                                                                           | The infections related to large open-air festivals may be underreported, given difficulty in ascertaining exact location of transmission and sporadic surveillance systems. The search strategy of only using ProMed and MEDLINE might have limited the amounts of results that might otherwise be available on other reporting/surveillance agencies.                               |

**Table 3. Continued**

| Reference               | Virus          | Location and Date                                                                  | Sample Description                                                                       | Design                                     | Outcomes Measured           | Exposure                                               | Outdoor Findings                                                                                                                                                                                                                                                                     | Indoor Findings                                                                                                                                                                                                                               | Bias                                                                                                                                                                                                                                                                                                                                                                                            |
|-------------------------|----------------|------------------------------------------------------------------------------------|------------------------------------------------------------------------------------------|--------------------------------------------|-----------------------------|--------------------------------------------------------|--------------------------------------------------------------------------------------------------------------------------------------------------------------------------------------------------------------------------------------------------------------------------------------|-----------------------------------------------------------------------------------------------------------------------------------------------------------------------------------------------------------------------------------------------|-------------------------------------------------------------------------------------------------------------------------------------------------------------------------------------------------------------------------------------------------------------------------------------------------------------------------------------------------------------------------------------------------|
| Pestre et al 2012 [18]  | H1N1 influenza | Summer camp in France, August 2009                                                 | 32 persons participated in the holiday camp; 29 of them traveled in the same train wagon | Retrospective case investigation           | Infection of H1N1 influenza | Individuals who did not travel in the same train wagon | The outbreak involved 21 children and 3 adults who had all travelled together in the same wagon. The 3 individuals that did not take the same train wagon and were immediately thereafter in contact with the 24 infected individuals at camp did not experience influenza symptoms. | Out of 29 individuals who took the same train wagon, 21 children and 3 adults experienced symptoms                                                                                                                                            | Conditions of outdoor versus indoor activities at camp were not described. Given this, the comparison between indoor (train wagon) and outdoor (camp) exposure assumes that a majority of time at camp, as compared to the train wagon, was outdoors. Measurement of cases might have been affected by timing of testing and/or presence of asymptomatic cases. Limitations were not discussed. |
| Summers et al 2010 [19] | 1918 influenza | His Majesty's New Zealand Transport military troop ship in Sierra Leone, July 1918 | 1217 persons onboard                                                                     | Retrospective historical outbreak analysis | Mortality                   | Sleeping in hammocks as opposed to cabins with bunks   | Of 1217 persons onboard, over 1000 suspected cases of influenza, 68 deaths. Mortality rate for persons that slept in hammocks outdoors was 28/820 or 34.1 persons/1000 population.                                                                                                   | Mortality rate for persons that slept in cabins with bunks was 39/267 (146.1 persons/1000 population). The difference between hammocks was significant (crude RR, 4.28; 95% CI, 2.69–6.81). Density did not seem to be a contributing factor. | Historical evidence used in this paper is subject to transcription and/or recording errors, lack of case definitions, and approximate estimates of case numbers. While it is hinted that hammocks were in higher ventilated zones outdoors as compared to cabins, the exact location of hammocks was not described.                                                                             |

Abbreviations: CI, confidence interval; NORS, National Outbreaks Reporting System; RR, relative risk.

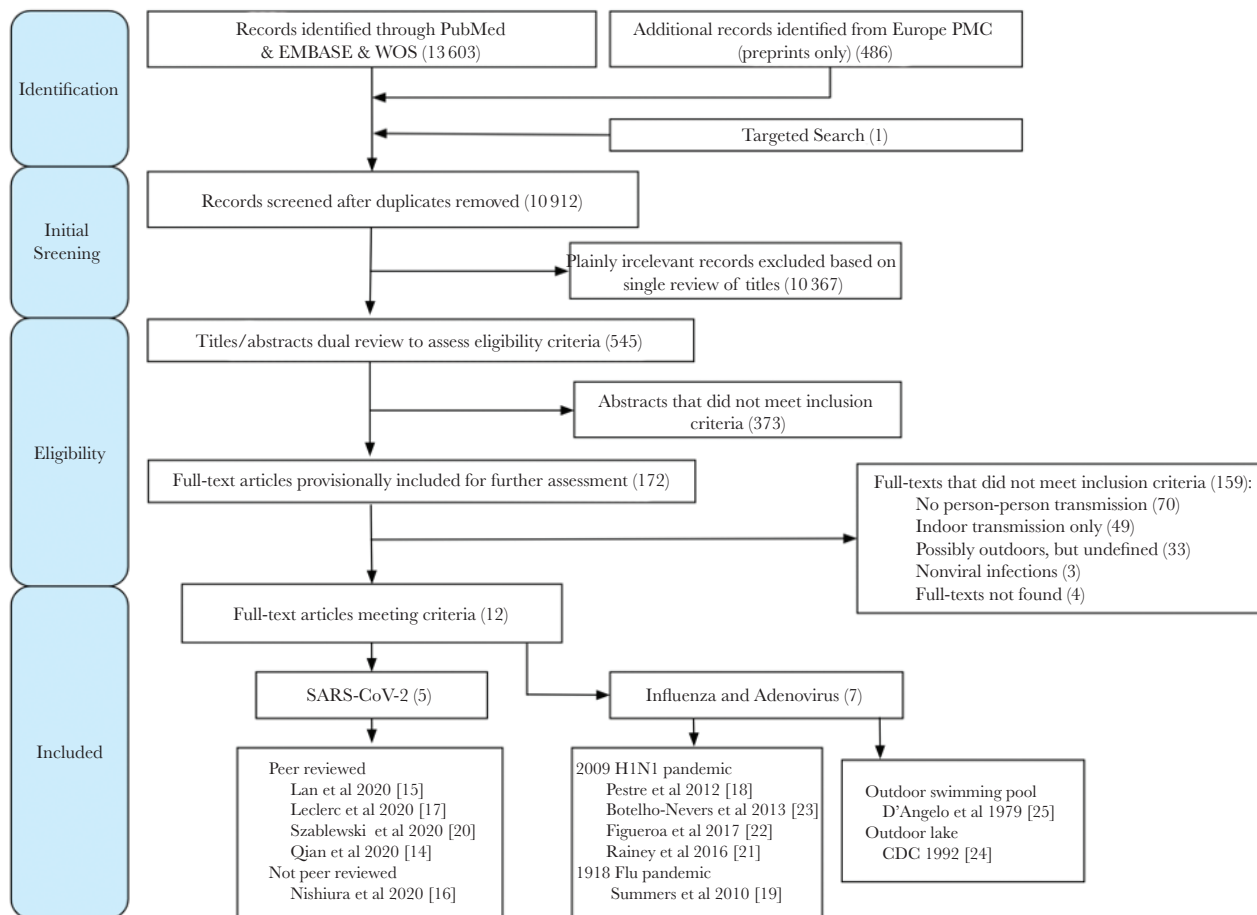

**Figure 1.** Preferred Reporting Items for Systematic Reviews and Meta-Analyses (PRISMA) diagram for the study. Abbreviations: CDC, Centers for Disease Control and Prevention; SARS-CoV-2, severe acute respiratory syndrome coronavirus 2; WOS, Web of Science.

mortality revealed a significant association between individuals who slept indoors, in cabins with bunks (mortality of 146.1/1000 population), versus individuals who slept in hammocks in open-air areas (mortality of 34.1/1000 population). This study is of particular interest because the duration of exposure and distance between individuals was held constant. This was one of the few studies that investigated potential confounders such as age and social class—mortality changed with age, but not with social class or rurality. Age did not change the discrepancy in deaths seen outdoors compared to indoors.

Pestre et al [18] conducted a retrospective analysis of a 2009 H1N1 influenza outbreak at a summer camp in France. Investigations revealed that all febrile individuals had travelled together in the same train passenger car to reach camp, suggesting that the enclosed space facilitated transmission. The 3 individuals out of 32 that had not travelled in the same train wagon as all the other participants never developed symptoms, even though they were still present at camp for 2 days with all other infected individuals—presumably mostly in outdoor spaces.

Finally, 3 reports about respiratory illnesses at mass open-air gatherings emphasized that while influenza outbreaks were uncommon, the duration of the event (multiday over single day) and communal housing were risk factors for outbreaks (Table 3) [21–23]. Rainey et al concluded that all reported outbreaks in summer camps had social contact and communal housing; none were reported without a shared housing component [21]. Of note, no single-day mass-gathering-related outbreaks were detected in the 72 outbreaks they detail. Figuroa et al also did not identify any single-day event-related outbreaks [22]. Botelho et al found 4 outbreaks of influenza A (H1N1) and 1 of influenza A and B; all events with an outbreak were multiday sport events while single-day events had none [23].

Two articles discussed adenovirus outbreaks associated with lakes [24] and outdoor swimming pools [25]. In both studies respiratory viral infection occurred in swimmers and in others who did not swim, such as fellow camp attendees and family members, suggesting human-to-human transmission prevalently occurring outdoors.



**Table 4. Outdoor Conditions Where COVID-19 Was Transmitted**

| Setting                              | Description of Transmission                                                                                                                                                                                                                                                                                                                                                                                                                                                                                                                                        | Purely Outdoors? | Use of Nonpharmaceutical Interventions <sup>a</sup>                                                                                                                                                                                                                                                                                                                                                                    |
|--------------------------------------|--------------------------------------------------------------------------------------------------------------------------------------------------------------------------------------------------------------------------------------------------------------------------------------------------------------------------------------------------------------------------------------------------------------------------------------------------------------------------------------------------------------------------------------------------------------------|------------------|------------------------------------------------------------------------------------------------------------------------------------------------------------------------------------------------------------------------------------------------------------------------------------------------------------------------------------------------------------------------------------------------------------------------|
| Overnight summer camp [20]           | Outbreak of 260 cases during an overnight camp in Georgia. Everyone tested negative for COVID-19 ≤12 days prior to coming to camp. While exact outdoor activities were not described, the overnight component suggests that the attack rate increased with length of time spent at the camp. This was shown by staff members, who were present at camp the longest, having the highest attack rate (56%). Attack rate associated with being adult, length of stay, and being in a cabin together. Median attack rate in the cabins, 50%; overall attack rate, 44%. | No               | Yes. They state the NPI was not effective. NPIs were cohorting of attendees by cabin (≤ 26 persons), staggering of cohorts for use of communal spaces, physical distancing outside cabin cohorts, and enhanced cleaning and disinfection, especially of shared equipment and spaces. Cloth masks were required for staff members. Evidently, these interventions were not effective at preventing a majority of cases. |
| Conversation in outdoor setting [14] | One outdoor transmission involving 2 cases in Shangqiu, Henan: a 27-year-old man had a conversation outdoors with an individual who had returned from Wuhan. No secondary or tertiary cases from this transmission were reported                                                                                                                                                                                                                                                                                                                                   | Yes              | Unknown                                                                                                                                                                                                                                                                                                                                                                                                                |
| Outdoor construction sites [15, 17]  | Four outbreaks at outdoor construction sites in Singapore, involving a total of 95 cases [17]. 5 cases of construction workers in Singapore [15]. Details of exact location of transmission were not described. Details of indoors versus outdoors unknown. However, in Leclerc et al [17] building sites were described as outdoor settings.                                                                                                                                                                                                                      | Unknown          | Unknown                                                                                                                                                                                                                                                                                                                                                                                                                |
| Jogging outdoors [17]                | 1 transmission while jogging in Codogno, Italy (reported by local news media, cited in Leclerc et al [17] open source database)                                                                                                                                                                                                                                                                                                                                                                                                                                    | Yes              | Unknown                                                                                                                                                                                                                                                                                                                                                                                                                |
| Outdoor park [17]                    | 20 cases in an outdoor park in Münster, Germany (reported by local news media, cited in Leclerc et al [17] open source database). The members of the extended family, who had been living in different houses in the Angelmöde district of Münster, were suspected to have met often on a playground in the Ostthuesheide district. The activities of the family were not described, but it was described as a repeated exposure over days.                                                                                                                        | Yes              | Unknown                                                                                                                                                                                                                                                                                                                                                                                                                |

Abbreviations: COVID-19 coronavirus disease 2019; NPI, nonpharmaceutical intervention.

<sup>a</sup>Such as masks, physical distance, cohorting.

## DISCUSSION

While the studies included in this review were highly heterogeneous, ranging in methodology, definition of outdoor transmission, and virus studied, several common factors were identified. The studies with direct comparison of SARS-CoV-2 location of transmission reported dramatically lower proportions occurring outdoors. The exact determinants of outdoor transmission that can be gleaned from this review are limited, the cases of outdoor transmission of SARS-CoV-2 we identified were affected by the duration of exposure, frequency of exposure, density of gathering, whether masks were used, and were confounded by the possibility of indoor transmission.

Historical evidence gleaned from influenza outbreaks further support the lower risk of transmission outdoors. Summers et al showed that influenza mortality on a ship was significantly lower outdoors (sleeping in hammocks) compared to indoors (sleeping in cabins) [19]. While mortality does not provide direct information about transmission, it serves as a useful proxy. Outcomes from several investigations of influenza outbreaks during mass outdoor gatherings suggest that outdoor, single-day events without communal sleeping arrangements have lower risks of influenza transmission than multiday events with indoor components [21–23].

These findings, as well as reports of influenza outbreaks and adenovirus outbreaks in outdoor bodies of water, suggest that while outdoor transmission is less common than indoor, it is not

impossible. Case reports identified after our review had been completed provide further evidence that high-density outdoor gatherings, particularly with low mask use, may lead to higher transmission rates. Miron et al noted that incidence of COVID-19 cases was significantly higher in 14 out of 20 counties that had a large outdoor gathering 15 days prior [26]. Dave et al estimated that in the 3 weeks following the start of the Sturgis motorcycle rally on 7 August 2020, in South Dakota, a multiday event with 500 000 participants, cases grew more in counties with weak mitigation policies than those with strong mitigation policies (such as closure of restaurants and bars, or mask-wearing mandates) as participants returned to their homes [27]. In contrast, although COVID-19 rates increased in the 3 weeks following the mass protests in the United States [28], the uptick in cases due to these events was less than expected because social distancing and masking measures were more widespread [29]. The importance of protective measures is further exemplified by the outdoor outbreak that occurred at the White House Rose Garden event on 26 September 2020, where few of the 200 attendees were wearing masks or maintaining social distancing measures [30].

Of note, our search did not find any studies on the transmission of COVID-19 in settings of outdoor agricultural work. In California, prevalence of COVID-19 for agricultural workers is 2 to 3 times higher than the rate for workers in all other industries [31]. The experience of agricultural workers suggests

that crowded working or sleeping conditions may be a substantive risk factor for transmission, but the contribution of work in outdoor spaces to transmission risk has not been assessed. We found that outdoor, single-day events without communal sleeping arrangements have lower risks of transmission compared to multiday, mass outdoor gatherings in the spread of influenza [21–23].

To better characterize the risks of outdoor SARS-CoV-2 exposure, future studies should fill the research gaps we have identified in this review. First, many research studies we identified did not report the location of transmission at all. This may be because understanding relationships between cases is more important than the location of interaction, or may be related to practical challenges in contact tracing outdoors. Second, it is difficult to isolate an outdoor exposure to a virus. While outdoor gatherings could be largely safe, if they are accompanied by time in indoor locations, such as cabins or trains, it might be challenging to identify the exact location of transmission. In the report by Szablewski et al, which was included in our review, while the summer camp may have been largely outdoors, it does not preclude exposure in the dining halls or cabins. As for construction sites, once a building is framed and enclosed, it may be considered indoor work, which may in fact be the majority of the work. Third, in many reports published early in the SARS-CoV-2 pandemic, the measured outcome was illness or death due to viral infection, not SARS-CoV-2 infection itself, which was rarely assessed. If asymptomatic infections are more likely to occur outdoors, this could represent a systematic bias. Fourth, the definition of being outdoors is ambiguous, and the effect of exposure is likely modified by variable proximity to and contact with others. Fifth, to test the hypothesis that the risk of infection is lower outdoors, future research should collect data about time spent indoors versus outdoors. Given that 90% of time is spent indoors in high- and middle-income countries [32], it would be expected that 90% of transmission occurs indoors, all else being equal. Lastly, there are few data that examine how respiratory droplets spread outdoors, such as how far they travel during running, biking, or during windy conditions. A study examined these variables but was calculated with no account of ventilation, sunlight, or humidity [33].

Finally, most of the transmission events we identified in the literature did not report the socioeconomic status of those impacted. Spreading events often occur in settings where marginalized and disempowered populations live or work such as lower-income, higher-density urban settings, work settings such as meat-packing plants, or even prisons [34]. While there are multiple reasons for the disproportionate impacts of COVID-19 in these populations, we postulate that lack of opportunity to move high-risk activities outdoors may be one of them [35, 36]. While it was our intention to further explore this hypothesis by analyzing subgroup socioeconomic and ethnicity

data in the studies included in this review, the studies did not include these metrics.

Future studies could compare SARS-CoV-2 case rates at outdoor gatherings to known rates for indoor gatherings. There are several examples of studies that estimate the risk of indoor transmission [37–39], which have ranged from 10.3% (95% CI, 5.3%–19.0%) in a study of train travel in China to 78% in a church in Arkansas [38]. Accurate estimation of the risk of outdoor transmission will require determining person-time at risk for infection, incidence rate ratios, and more nuanced information about the exposure environment; these data are still lacking.

Better understanding of how SARS-CoV-2 is transmitted outdoors is needed to inform sound policies that reconcile shelter-in-place orders with the many health benefits associated with time spent outdoors [40]. This is particularly relevant to outdoor parks and recreation agencies, which seek clear guidance on how being outdoors has a low risk of transmission. Other policy implications are to encourage moving essential activities outdoors, with appropriate masking and social distancing measures, given that transmission can still occur outdoors. The long-term and potentially deleterious social and emotional effects of school closures can be potentially mitigated if, for example, it is known that outdoor schooling is a viable alternative. Finally, encouraging outdoor time may serve as a harm reduction model in allowing people to congregate, and therefore better tolerate long-term shelter in place mandates.

This systematic review has several limitations. The few and heterogenous studies on outdoor transmission of respiratory viruses had used various metrics, exposures, and outcomes, making it challenging to compare findings quantitatively. The low proportion of outdoor COVID-19 cases may reflect the general decrease in outdoor activities since strict lockdowns were enacted in the countries surveyed. Relying on reports of symptomatic infections may underrepresent asymptomatic cases that occur outdoors. If the viral inoculum affects the severity of respiratory viral infection, an outdoor exposure may reduce the viral inoculum to which the individual is exposed and therefore the subsequent clinical impact of the disease. If this theory were true for SARS-CoV-2, it may increase the proportion of infections that are asymptomatic [41]. The studies in this review did not contain much information about potential confounders such as the age of infected individuals, activities in which they participated, ethnicity, or social class. There was minimal information on mitigation efforts such as masks and social distancing and how that may have impacted/influenced viral transmission. This review did not explicitly include gray literature (such as case reports from health departments, lay newspaper sources) in its search strategy, as other comprehensive reviews of transmissions have done [17]. Including preprints may have decreased our risk of information bias.

## CONCLUSION

While it has been acknowledged that spending time outside has general health benefits, our review posits that there are also benefits in reducing transmission of SARS-CoV-2 by reducing exposure time (substituting time indoors with time outdoors). These results suggest that moving activities to outdoor settings may reduce infections and ultimately save lives. However, it is important to note that infections are possible outdoors and the advantage may be overtaken by relaxed mitigation efforts.

## Supplementary Data

Supplementary materials are available at *The Journal of Infectious Diseases* online. Consisting of data provided by the authors to benefit the reader, the posted materials are not copyedited and are the sole responsibility of the authors, so questions or comments should be addressed to the corresponding author.

## Notes

**Disclaimer.** The funders played no role in the decision to conduct this study, the analysis, findings, or writing of this manuscript.

**Financial support.** T. C. B. was supported by the Shoemaker grant offered by the University of California Berkeley–University of California San Francisco Joint Medical Program. M. M. and N. R. were supported by grants from the REI Foundation and the Long Foundation.

**Potential conflicts of interest.** All authors: No reported conflicts of interest. All authors have submitted the ICMJE Form for Disclosure of Potential Conflicts of Interest. Conflicts that the editors consider relevant to the content of the manuscript have been disclosed.

## References

1. Razani N, Radhakrishna R, Chan C. Public lands are essential to public health during a pandemic. *Pediatrics* **2020**; 146:e20201271.
2. van Doremalen N, Bushmaker T, Morris DH, et al. Aerosol and surface stability of SARS-CoV-2 as compared with SARS-CoV-1. *N Engl J Med* **2020**; 382:1564–7.
3. Lu J, Gu J, Gu J, et al. COVID-19 outbreak associated with air conditioning in restaurant, Guangzhou, China, 2020. *Emerg Infect Dis* **2020**; 26:1628–31.
4. Hamner L, Dubbel P, Capron I, et al. High SARS-CoV-2 attack rate following exposure at a choir practice—Skagit County, Washington, March 2020. *MMWR Morb Mortal Wkly Rep* **2020**; 69:606–10.
5. Park SY, Kim YM, Yi S, et al. Coronavirus disease outbreak in call center, South Korea. *Emerg Infect Dis* **2020**; 26:1666–70.
6. Jamous F, Meyer N, Buus D, et al. Critical illness due to COVID-19: a description of the surge in a single center in Sioux Falls. *S D Med* **2020**; 73:312–7.
7. Man P de, Paltansing S, Ong DSY, Vaessen N, Nielen G van, Koeleman JGM. Outbreak of COVID-19 in a nursing home associated with aerosol transmission as a result of inadequate ventilation [published online ahead of print 28 August 2020]. *Clin Infect Dis* doi: [10.1093/cid/ciaa1270](https://doi.org/10.1093/cid/ciaa1270).
8. Wei J, Li Y. Airborne spread of infectious agents in the indoor environment. *Am J Infect Control* **2016**; 44:S102–8.
9. Willem L, Van Kerckhove K, Chao DL, Hens N, Beutels P. A nice day for an infection? Weather conditions and social contact patterns relevant to influenza transmission. *PLoS One* **2012**; 7:e48695.
10. Kanzawa M, Spindler H, Anglemyer A, Rutherford GW. Will coronavirus disease 2019 become seasonal? *J Infect Dis* **2020**; 222:719–21.
11. Moriyama M, Hugentobler WJ, Iwasaki A. Seasonality of respiratory viral infections. *Annu Rev Virol* **2020**; 7:83–101.
12. Gou Y, Graff F, Kilian O, et al. Europe PMC: a full-text literature database for the life sciences and platform for innovation. *Nucleic Acids Res* **2015**; 43:D1042–8.
13. Ouzzani M, Hammady H, Fedorowicz Z, Elmagarmid A. Rayyan—a web and mobile app for systematic reviews. *Syst Rev* **2016**; 5:210.
14. Qian H, Miao T, Liu L, Zheng X, Luo D, Li Y. Indoor transmission of SARS-CoV-2 [published online ahead of print October 31, 2020]. *Indoor Air*. doi:[10.1111/ina.12766](https://doi.org/10.1111/ina.12766).
15. Lan F-Y, Wei C-F, Hsu Y-T, Christiani DC, Kales SN. Work-related COVID-19 transmission in six Asian countries/areas: a follow-up study. *PLoS One* **2020**; 15:e0233588.
16. Nishiura H, Oshitani H, Kobayashi T, et al. Closed environments facilitate secondary transmission of coronavirus disease 2019 (COVID-19). medRxiv, doi: [10.1101/2020.02.28.20029272](https://doi.org/10.1101/2020.02.28.20029272), 16 April 2020, preprint: not peer reviewed.
17. Leclerc QJ, Fuller NM, Knight LE, Funk S, Knight GM; CMMID COVID-19 Working Group. What settings have been linked to SARS-CoV-2 transmission clusters? *Wellcome Open Res* **2020**; 5:83.
18. Pestre V, Morel B, Encrenaz N, et al. Transmission by super-spreading event of pandemic A/H1N1 2009 influenza during road and train travel. *Scand J Infect Dis* **2012**; 44:225–7.
19. Summers JA, Wilson N, Baker MG, Shanks DG. Mortality risk factors for pandemic influenza on New Zealand troop ship, 1918. *Emerg Infect Dis* **2010**; 16:1931–37.
20. Szablewski CM, Chang KT, Brown MM, et al. SARS-CoV-2 transmission and infection among attendees of an overnight camp—Georgia, June 2020. *MMWR Morb Mortal Wkly Rep* **2020**; 69:1023–5.
21. Rainey JJ, Phelps T, Shi J. Mass gatherings and respiratory disease outbreaks in the United States—should we be worried? Results from a systematic literature review and

- analysis of the national outbreak reporting system. *PLoS One* **2016**; 11:e0160378.
22. Figueroa A, Gulati RK, Rainey JJ. Estimating the frequency and characteristics of respiratory disease outbreaks at mass gatherings in the United States: findings from a state and local health department assessment. *PLoS One* **2017**; 12:e0186730.
  23. Botelho-Nevers E, Gautret P. Outbreaks associated to large open air festivals, including music festivals, 1980 to 2012. *Euro Surveill* **2013**; 18:20426.
  24. From the Centers for Disease Control. Outbreak of pharyngoconjunctival fever at a summer camp—North Carolina, 1991. *J Am Med Assoc* **1992**; 267:2867–8.
  25. D'Angelo LJ, Hierholzer JC, Keenlyside RA, Anderson LJ, Martone WJ. Pharyngoconjunctival fever caused by adenovirus type 4: report of a swimming pool-related outbreak with recovery of virus from pool water. *J Infect Dis* **1979**; 140:42–7.
  26. Miron O, Yu K-H, Wilf-Miron R, Davidovitch N. COVID-19 infections following outdoor mass gatherings in low incidence areas: retrospective cohort study. medRxiv, doi: [10.1101/2020.10.22.20184630](https://doi.org/10.1101/2020.10.22.20184630), 27 October 2020, preprint: not peer reviewed.
  27. Dave D, Friedson AI, McNichols D, Sabia JJ. The contagion externality of a superspreading event: the Sturgis motorcycle rally and COVID-19, 2020. <https://www.iza.org/en/publications/dp/13670/the-contagion-externality-of-a-superspreading-event-the-sturgis-motorcycle-rally-and-covid-19>. Accessed 7 December 2020.
  28. Valentine R, Valentine D, Valentine JL. Relationship of George Floyd protests to increases in COVID-19 cases using event study methodology. *J Public Health (Oxf)* **2020**; 42:696–7.
  29. Dave D, Friedson A, Matsuzawa K, Sabia J, Safford S. Black lives matter protests, social distancing, and COVID-19. Cambridge, MA, 2020. <http://www.nber.org/papers/w27408.pdf>. Accessed 7 December 2020.
  30. Buchanan L, Gamio L, Leatherby L, Keefe J, Koettl C, Schoenfeld Walker A. Tracking the White House coronavirus outbreak. *New York Times*, 14 October 2020. <https://www.nytimes.com/interactive/2020/10/02/us/politics/trump-contact-tracing-covid.html>. Accessed 7 December 2020.
  31. Tuiran R, Roberts N. Farmworkers are among those at highest risk for COVID-19, studies show. PBS, 21 July 2020. <https://www.pbs.org/wgbh/frontline/article/covid-19-farmworkers-among-highest-risk-studies-show/>. Accessed 7 December 2020.
  32. Klepeis NE, Nelson WC, Ott WR, et al. The national human activity pattern survey (NHAPS): a resource for assessing exposure to environmental pollutants. *J Expo Anal Environ Epidemiol* **2001**; 11:231–52.
  33. Blocken B, Malizia F, Druenen T Van, Marchal T. Towards aerodynamically equivalent COVID-19 1.5 m social distancing for walking and running [Preprint]. 2020. Available at: [http://www.urbanphysics.net/Social%20Distancing%20v20\\_White\\_Paper.pdf?fbclid=IwAR05zYIcuHQnDEr\\_jEsrsHBFiNYoDa4Fw3CKAWwHfANgnZ-ug5dxrNpsLS8](http://www.urbanphysics.net/Social%20Distancing%20v20_White_Paper.pdf?fbclid=IwAR05zYIcuHQnDEr_jEsrsHBFiNYoDa4Fw3CKAWwHfANgnZ-ug5dxrNpsLS8). Accessed 28 December 2020.
  34. Tai DBG, Shah A, Doubeni CA, Sia IG, Wieland ML. The disproportionate impact of COVID-19 on racial and ethnic minorities in the United States [published online ahead of print 20 June 2020]. *Clin Infect Dis* doi: [10.1093/cid/ciaa815](https://doi.org/10.1093/cid/ciaa815).
  35. Klompmaker JO, Hart JE, Holland I, et al. County-level exposures to greenness and associations with COVID-19 incidence and mortality in the United States. medRxiv, doi: [10.1101/2020.08.26.20181644](https://doi.org/10.1101/2020.08.26.20181644), 16 November 2020, preprint: not peer reviewed.
  36. Johnson TF, Hordley LA, Greenwell MP, Evans LC. Effect of park use and landscape structure on COVID-19 transmission rates. medRxiv, doi: [10.1101/2020.10.20.20215731](https://doi.org/10.1101/2020.10.20.20215731), 21 October 2020, preprint: not peer reviewed.
  37. Jing QL, Liu MJ, Zhang ZB, et al. Household secondary attack rate of COVID-19 and associated determinants in Guangzhou, China: a retrospective cohort study. *Lancet Infect Dis* **2020**; 20:1141–50.
  38. James A, Eagle L, Phillips C, et al. High COVID-19 attack rate among attendees at events at a Church—Arkansas, March 2020. *MMWR Morb Mortal Wkly Rep* **2020**; 69:632–5.
  39. Hu M, Lin H, Wang J, et al. The risk of COVID-19 transmission in train passengers: an epidemiological and modelling study [published online ahead of print 29 July 2020]. *Clin Infect Dis* doi: [10.1093/cid/ciaa1057](https://doi.org/10.1093/cid/ciaa1057).
  40. Kondo MC, Fluehr JM, McKeon T, Branas CC. Urban green space and its impact on human health. *Int J Environ Res Public Health* **2018**; 15:445.
  41. Gandhi M, Rutherford GW. Facial masking for COVID-19—potential for “variolation” as we await a vaccine. *N Engl J Med* **2020**; 383:e101.
